# Supplementary material for: Sodium alginate prevents progression of non-alcoholic steatohepatitis and liver carcinogenesis in obese and diabetic mice
Source: PubMed Central journal article supplement (PMC4891131; doi:10.18632/oncotarget.7249), 2016-02-08
Supplement: oncotarget-07-10448-s001.pdf [file oncotarget-07-10448-s001.pdf]

**SUPPLEMENTARY TABLE****Supplementary Table 1: Primer sequences**

| Gene                            | Primer sequences (5'-3') |                          |
|---------------------------------|--------------------------|--------------------------|
|                                 | forward                  | reverse                  |
| <i>Catalase</i>                 | CCTCCTCGTTCAGGATGTGGTT   | CGAGGGTACGAACTGTGTCAG    |
| <i>CCL2</i>                     | ACTGAAGCCAGCTCTCTTTCCTC  | TTCCTTCTTGGGGTCAGCACAGAC |
| <i>F4/80</i>                    | ACAAGACTGACAACCAGACGG    | TAGCATCCAGAAGAAGCAGGCCGA |
| <i>FAS</i>                      | TGGAAAGATAACTGGGTGAC     | TGCTGTCGTCTGTAGTCTTG     |
| <i>GAPDH</i>                    | GACATCAAGAAGGTGGTGAAGCAG | ATACCAGGAAATGAGCTTGACAAA |
| <i>GPx1</i>                     | TTTCCCGTGCAATCAGTTC      | TCGGACGTACTTGAGGGAAT     |
| <i>IL-1<math>\beta</math></i>   | CAAGCAACGACAAAATACCTGTG  | AGACAAACCGTTTTTCCATCTTCT |
| <i>IL-6</i>                     | CCGGAGAGGAGACTTCACAGAG   | CTGCAAGTGCATCATCGTTGTT   |
| <i>PPAR-<math>\alpha</math></i> | AGAGCCCCATCTGTCTCTC      | ACTGGTAGTCTGCAAAACCAAA   |
| <i>SREBP1c</i>                  | CGGAAGCTGTCTGGGGTAG      | GTTGTTGATGAGCTGGAGCA     |
| <i>TNF-<math>\alpha</math></i>  | TGGCCCAGACCCTCACACTCAG   | ACCCATCGGCTGGCACCCT      |
